# Supplementary material for: Machine learning-based identification and immune characterization of ferroptosis-related molecular clusters in osteoarthritis and validation
Source: Aging (Albany NY). 2024 May 29;16(11):9437–59. doi: 10.18632/aging.205875 (PMC11210262; doi:10.18632/aging.205875)
Supplement: Supplementary File 2 [file aging-16-205875-s004.xlsx]

## Sheet: Supplementary File 2
Supplementary File 2. Training-set-risk-score.
ID	group	GABARAPL1	SAT1	EGFR	ELOVL5	TBK1	SLC39A7	TRIM26	PTPN6	BEX1	risk
GSM1332201_Control	0	8.39597	12.1031	7.04277	8.65493	8.02028	6.97629	7.31022	7.34373	5.84803	-23.2903
GSM1332202_Control	0	9.30566	11.9535	9.09736	9.0508	8.842	7.23201	7.55091	7.7854	5.07076	-24.6945
GSM1332203_Control	0	8.76201	11.6149	9.68756	8.15608	8.41358	8.14657	7.63046	6.90667	5.74875	-25.2199
GSM1332204_Control	0	8.44179	11.393	9.48792	9.41854	9.0062	8.07724	8.14489	7.54096	6.34563	-25.4208
GSM1332205_Control	0	8.37379	11.925	8.98208	8.79585	9.46414	7.67959	7.58438	7.38462	6.28779	-25.5656
GSM1332206_Control	0	8.15501	12.4129	9.26991	9.10553	9.08231	7.28456	8.39847	7.56678	6.03832	-24.5614
GSM1332207_Control	0	7.20266	11.5936	8.18868	8.69515	9.26486	8.0109	8.00772	7.23248	6.4793	-24.3284
GSM1332208_Control	0	8.34334	11.3696	9.01209	9.10458	9.05009	7.90755	7.90195	7.50826	6.62479	-25.3003
GSM1332209_Control	0	8.95863	12.1309	9.29348	8.60871	9.30237	6.9778	7.65499	7.71704	5.1111	-24.5614
GSM1332210_Control	0	7.46588	11.6415	8.90624	8.81549	8.67386	7.90456	8.00833	7.87898	6.48498	-24.1819
GSM1332211_Treat	1	6.13572	10.9251	8.03854	7.70004	8.61655	7.15736	7.42538	8.41359	6.02075	-21.6016
GSM1332212_Treat	1	7.30721	10.7229	7.87602	7.99566	8.34264	6.96121	7.43266	8.29163	5.80226	-21.8875
GSM1332213_Treat	1	7.22223	12.1309	8.12371	8.86663	8.05983	8.29998	7.80588	8.31258	5.3122	-23.0745
GSM1332214_Treat	1	6.92683	10.323	8.73874	8.87601	8.20023	7.41313	7.0921	7.97773	5.49965	-22.4772
GSM1332215_Treat	1	7.68846	11.1576	8.01874	9.11873	8.41717	7.58881	7.78798	7.90238	5.24196	-22.8032
GSM1332216_Treat	1	6.62297	10.5053	6.73014	8.73563	8.18758	6.89861	7.80446	8.55227	6.01497	-20.7964
GSM1332217_Treat	1	7.5046	11.4061	4.99904	8.22989	8.8262	7.31865	7.79716	8.29472	5.61162	-21.4519
GSM1332218_Treat	1	7.60709	11.6307	6.61124	8.30834	8.8223	7.18424	7.5348	8.68459	4.78261	-21.6919
GSM1332219_Treat	1	6.53234	10.5701	7.29143	7.9267	8.59016	7.34328	8.1039	8.38335	4.78554	-20.3898
GSM1332220_Treat	1	6.36059	11.3396	8.41717	7.72967	8.64471	7.7854	7.83821	8.0811	6.39676	-22.6584
GSM1332221_Treat	1	7.41908	12.6047	6.74269	8.83224	7.92529	7.97521	7.61733	8.48971	5.67527	-22.8073
GSM1332222_Treat	1	7.08196	11.9727	6.4387	8.59963	8.20943	7.31473	7.40696	8.59016	4.67627	-21.2698
GSM1332223_Treat	1	6.25482	11.2486	6.79178	8.24571	8.33897	6.79548	7.34805	8.69864	5.33464	-20.5646
GSM1332224_Treat	1	6.01358	11.522	6.6502	8.5549	8.56838	7.1493	8.18809	8.98042	5.53371	-20.4739
GSM1332225_Treat	1	6.07283	11.4364	6.50138	8.18243	9.17883	8.09433	8.21	8.99727	5.36853	-21.269
GSM1332226_Treat	1	6.77886	11.5271	6.71621	8.91775	8.65081	7.19632	8.08433	8.44924	5.96619	-21.7276
GSM1332227_Treat	1	6.34419	11.9378	7.31386	8.42407	8.87293	7.37465	7.7643	8.96936	5.33412	-21.6019
GSM1332228_Treat	1	6.31879	11.3567	7.20735	8.23446	8.58228	7.30972	8.49145	9.23192	5.66988	-20.6609
GSM1332229_Treat	1	5.78418	11.1037	7.30136	7.87602	9.01037	7.55779	8.19724	8.76062	5.9564	-21.1106
GSM1332230_Treat	1	6.29852	11.4229	7.04622	8.23716	8.73563	7.62132	7.98316	8.80242	5.12713	-21.0634
GSM1337304_Control	0	7.69592	12.3215	7.27501	8.98908	8.80094	7.34897	7.87509	7.55444	5.93135	-23.5266
GSM1337305_Control	0	8.3277	11.8346	9.00209	8.19957	8.72658	8.41311	7.5741	8.13012	6.40532	-25.2271
GSM1337306_Control	0	8.48381	11.8085	8.80694	9.21321	8.71814	7.34704	7.20838	6.52295	7.06535	-25.9493
GSM1337307_Control	0	9.32274	12.2954	7.39314	9.73835	9.21047	7.72056	7.61016	8.3277	5.73532	-25.207
GSM1337308_Control	0	8.85255	12.5394	8.38634	9.87787	9.21988	7.96226	7.5849	7.28645	7.2202	-26.9402
GSM1337309_Control	0	8.29528	11.9125	9.99692	8.78703	8.78174	7.93682	7.49593	7.91086	5.50663	-25.0528
GSM1337310_Control	0	6.85084	11.7255	8.53797	8.36834	8.65081	8.14923	7.89227	8.49715	5.12275	-22.69
GSM1337311_Control	0	7.96833	11.7862	9.45865	8.4339	8.24778	7.91458	7.76485	8.6151	5.30347	-23.5629
GSM1337312_Control	0	8.21446	11.9938	9.74978	8.27207	8.53968	7.7587	7.61688	8.22381	6.02664	-24.632
GSM1337313_Control	0	8.74011	11.7196	8.34003	8.13222	8.57356	7.5945	7.58836	8.29581	6.0121	-24.1345
GSM1337314_Treat	1	6.78785	10.9309	7.16484	7.74254	8.54112	7.62902	7.86721	8.74087	6.10461	-21.6636
GSM1337315_Treat	1	6.88163	11.2944	7.26413	8.33836	9.25682	7.03464	7.71911	7.07433	4.49019	-21.7298
GSM1337316_Treat	1	5.55779	11.9535	6.32995	8.49893	8.92008	7.14653	8.13494	8.43877	5.25258	-20.4655
GSM1337317_Treat	1	5.93804	11.8214	6.39927	8.17319	9.3843	7.21113	8.5935	9.01374	5.80826	-20.7987
GSM1337318_Treat	1	6.69512	10.1427	8.65969	8.46668	8.32155	6.74558	8.14811	7.70526	6.00334	-21.3921
GSM1337319_Treat	1	6.88923	11.6909	8.21857	8.48971	8.73648	7.2121	7.96457	8.29293	5.51208	-22.2339
GSM1337320_Treat	1	5.6075	10.8224	5.87254	9.0688	8.52674	7.74422	8.53968	9.49936	4.73866	-19.2825
GSM1337321_Treat	1	6.31633	10.9833	6.92238	8.66959	8.94397	7.19917	7.65259	8.90069	5.42114	-21.1666
GSM1337322_Treat	1	6.20703	12.1031	7.00671	8.66672	8.97523	8.15727	7.33805	8.23149	5.49869	-22.8116
GSM1337323_Treat	1	6.23684	11.2608	5.93135	8.37619	9.19117	7.33293	8.20711	8.54178	5.6459	-20.9023
GSM1337324_Treat	1	6.77929	11.6802	6.24763	8.54837	8.94746	7.07336	7.86262	7.81413	5.16821	-21.4205
GSM1337325_Treat	1	7.05225	11.379	5.90927	8.9526	8.86166	7.47157	8.05767	8.33897	4.77589	-21.164
GSM1337326_Treat	1	7.02048	11.6307	7.37125	8.05817	8.71681	7.85646	7.87645	8.91522	4.92134	-21.7602
GSM1337327_Treat	1	7.45104	11.0404	7.66336	8.13705	8.30294	7.71184	7.70004	8.19045	5.39076	-22.212
GSM1337328_Treat	1	7.18755	10.8556	7.65655	8.29528	8.61785	7.05225	7.59692	8.18988	5.23837	-21.6859
GSM1337329_Treat	1	7.59595	10.9453	8.41311	8.4049	8.05653	7.82308	8.47826	8.04518	4.78992	-21.7409
GSM1337330_Treat	1	7.7708	11.4145	6.85323	8.41415	8.0821	7.19729	7.22337	8.50543	6.12171	-22.4923
GSM1337331_Treat	1	7.15736	10.265	7.96626	8.6453	8.18598	7.24621	7.23684	7.48879	6.53331	-22.8136
GSM1337332_Treat	1	7.34229	10.9004	7.89431	8.52821	8.44724	7.87704	7.77221	8.37379	5.74229	-22.6371
GSM1337333_Treat	1	7.6681	11.5015	7.54096	8.15842	8.16618	7.00389	7.64433	7.84079	6.44993	-22.7181
GSM1337334_Treat	1	6.55276	11.2486	7.44118	8.14537	8.55162	6.78829	7.82588	8.51594	5.61708	-21.0502
GSM1337335_Treat	1	6.51636	10.9251	7.62665	8.53658	8.44786	7.3324	7.91195	7.71602	5.55527	-21.5987
GSM1337336_Treat	1	7.68343	11.5672	8.64736	8.31203	8.56965	7.74721	8.40086	8.87438	5.17313	-22.4219
GSM2048265_Control	0	7.28595	10.6715	6.52967	8.49391	8.78936	7.47157	6.6634	7.24172	5.49913	-22.7882
GSM2048266_Control	0	8.05103	9.83375	8.84956	8.72923	8.84877	6.53846	7.77783	7.46588	6.24482	-22.9644
GSM2048267_Control	0	7.78594	11.1352	7.72565	8.44858	9.01697	7.13349	7.29275	7.66231	5.98763	-23.4387
GSM2048268_Control	0	7.92045	11.3435	8.40887	9.06429	8.72923	7.11492	7.58881	8.28748	6.09393	-23.5653
GSM2048269_Control	0	7.99992	12.2185	7.89869	8.97357	8.7447	7.33097	7.19874	7.86773	6.85465	-24.8022
GSM2048270_Control	0	7.40103	12.5661	8.74762	9.60333	8.42288	7.55681	8.06589	8.24721	6.1398	-23.9259
GSM2048271_Control	0	7.43763	12.2185	8.65969	8.95425	8.44125	7.25669	7.53712	8.34264	6.86103	-24.1134
GSM2048272_Treat	1	5.38276	12.0964	9.25121	8.91606	8.37965	7.6489	8.23663	8.01967	5.54684	-22.007
GSM2048273_Treat	1	4.48328	11.8346	6.51185	9.34168	8.36055	6.56704	7.77471	7.64224	5.59966	-19.981
GSM2048274_Treat	1	7.57906	11.5415	5.4813	7.86773	8.60385	7.43166	8.16822	8.1759	4.92564	-20.935
GSM2048275_Treat	1	6.76995	11.2642	7.49971	7.71655	8.52821	7.90755	8.11493	8.00564	5.60311	-21.878
GSM2048276_Treat	1	6.59451	12.6957	6.42259	8.75995	8.30563	7.95249	7.88128	9.11629	5.89607	-22.1478
GSM2048277_Treat	1	7.08347	11.657	7.90655	7.63512	8.51462	7.97773	7.59044	7.99514	5.94289	-22.989
GSM2048278_Treat	1	8.45178	11.3316	7.74721	8.0312	8.21557	7.94625	7.73867	8.08668	6.17802	-23.6234
GSM2048279_Treat	1	6.8906	12.2185	5.79047	8.79585	8.47293	7.41209	8.1865	8.7483	5.49582	-21.2669
GSM2048280_Treat	1	6.49268	12.1782	8.16504	8.89911	8.45672	7.30489	8.27966	8.25366	5.07885	-21.716
GSM2048281_Treat	1	7.25111	11.1931	8.41851	7.77783	8.5816	7.63563	8.11213	8.9526	5.44894	-21.9751
GSM2048282_Treat	1	8.12207	11.522	6.57174	7.65205	8.50934	8.05159	7.66336	7.92954	5.48032	-22.8135
GSM2048283_Treat	1	7.53192	11.7255	8.5776	8.67866	8.52608	7.79127	7.69489	8.4631	5.15765	-23.0657
GSM2048284_Treat	1	7.12145	10.6785	6.06548	7.66029	8.85325	7.84332	7.63162	8.02597	5.5831	-21.7195
GSM2048285_Treat	1	7.50213	10.8224	9.43927	8.46668	9.03591	7.61733	7.90292	8.84272	4.01098	-22.1417
GSM2048286_Treat	1	7.74668	11.7196	8.27328	8.61714	9.59554	6.82081	7.83617	7.86262	5.60959	-23.4131
GSM2048287_Treat	1	7.20221	10.9603	9.98836	7.92045	9.81051	7.54782	8.15842	9.01374	5.34947	-23.1261
GSM6265690_Control	0	7.69946	11.7483	8.0968	8.62911	8.92411	7.87206	7.56137	7.74872	4.95692	-23.4821
GSM6265691_Control	0	9.22551	11.4966	8.55824	8.94328	9.01969	7.27306	7.95465	6.92538	6.6766	-25.3917
GSM6265692_Control	0	7.24555	11.5467	8.49893	8.44724	9.02549	8.03417	7.66605	8.0821	5.75682	-23.7238
GSM6265693_Control	0	6.59218	11.5626	8.92562	8.44609	9.13079	7.7752	7.64941	7.99616	5.90435	-23.4794
GSM6265694_Control	0	7.1687	11.3396	8.07885	8.76424	8.92808	8.37012	7.58345	7.68597	5.8164	-23.9314
GSM6265695_Control	0	7.87314	11.8407	9.16796	8.36592	9.14527	7.5102	7.36273	7.32713	6.19183	-24.9046
GSM6265696_Control	0	7.63512	11.7862	8.28748	8.76062	8.98988	7.7828	7.24765	7.98174	6.07725	-24.3947
GSM6265697_Treat	1	6.72768	11.9378	6.4954	8.48326	7.9989	7.28695	8.34517	8.94746	5.13262	-20.4238
GSM6265698_Treat	1	7.78966	11.9313	6.61655	8.61996	8.5855	7.50114	7.87704	8.33776	5.82941	-22.6927
GSM6265699_Treat	1	6.78457	10.3584	6.59407	6.99925	8.36711	6.33306	7.19976	8.6125	6.41934	-20.5375
GSM6265700_Treat	1	7.44118	12.0015	6.89759	8.49836	8.63126	7.29466	7.86217	8.32957	5.29816	-22.113
GSM6265701_Treat	1	5.67132	11.2078	8.27266	7.83102	8.48326	7.24865	8.18298	8.29998	3.93729	-19.7506
GSM6265702_Treat	1	6.816	12.1468	6.20756	8.45111	8.57287	7.35471	7.99345	8.53726	5.43002	-21.4137
GSM6265703_Treat	1	7.26964	11.1144	8.11493	8.35675	7.92954	7.2306	8.49274	9.17322	5.32276	-20.9027
GSM6265704_Treat	1	7.8556	10.9765	6.99684	8.99462	8.01967	7.41515	7.95092	8.842	6.01647	-22.0871
GSM6265705_Treat	1	6.88163	11.6681	6.78785	8.69864	8.72579	7.57047	7.98174	8.28628	5.77056	-22.134
