# Supplementary material for: Machine learning-based identification and immune characterization of ferroptosis-related molecular clusters in osteoarthritis and validation
Source: Aging (Albany NY). 2024 May 29;16(11):9437–59. doi: 10.18632/aging.205875 (PMC11210262; doi:10.18632/aging.205875)
Supplement: Supplementary File 3 [file aging-16-205875-s005.xlsx]

## Sheet: Supplementary File 3
Supplementary File 3. Validation-set-risk-score.
Tag	GROUP	GABARAPL1	SAT1	EGFR	ELOVL5	TBK1	SLC39A7	TRIM26	PTPN6	BEX1	risk
GSM2183532	0	8.0818	7.38947	5.138	6.52517	8.84392	6.58796	4.54226	5.61765	4.43296	-21.3017
GSM2183533	0	8.59006	6.99939	6.09878	6.0067	8.88387	5.48864	6.31288	5.94017	5.66959	-20.4323
GSM2183534	0	8.37079	9.09178	5.41755	6.64886	9.10381	6.2211	5.62059	6.17792	5.29278	-21.9303
GSM2183535	0	8.66386	9.39979	6.28904	6.53857	8.67913	6.24413	6.07253	6.87652	5.57592	-21.9735
GSM2183536	0	8.71482	9.61767	6.34491	6.68839	8.70598	6.41278	5.40259	6.33807	6.40939	-23.4555
GSM2183537	0	8.0598	9.63801	6.30574	7.25646	8.1809	6.84298	6.69488	6.74819	5.93546	-21.9221
GSM2183538	0	8.3269	9.20763	6.2504	6.84678	8.25833	6.38888	5.97269	6.88142	6.47573	-22.2354
GSM2183539	1	7.67321	8.3557	5.58923	7.09242	7.98128	6.09592	6.86047	5.72247	5.86047	-20.2765
GSM2183540	1	7.20618	8.93103	5.22095	6.46135	8.53021	6.21723	7.29462	6.40769	4.41278	-18.8723
GSM2183541	1	7.90837	8.68359	5.75321	6.2279	8.63554	6.33628	6.49985	6.42962	4.78136	-20.2615
GSM2183542	1	8.42605	8.97037	5.69229	6.13575	8.21383	6.47573	5.90207	6.42291	6.26303	-21.8393
GSM2183543	1	8.35351	9.17306	5.39532	6.1161	8.56071	6.27053	6.35931	6.61029	3.8679	-19.9297
GSM2183544	1	7.65026	10.0602	6.03986	6.66889	8.41236	6.95768	7.02901	6.97842	4.43962	-20.5194
GSM2183545	1	8.37415	9.66108	5.2853	6.75792	8.22882	6.44956	6.35579	6.53138	5.848	-21.5351
GSM2183546	1	8.55329	7.78841	5.42504	5.95559	8.31334	6.1127	5.44956	5.32553	4.67243	-20.6766
GSM2183547	1	8.41832	9.71258	6.08488	6.08768	8.46352	7.2817	8.33181	7.40939	5.53294	-20.7002
GSM2183548	1	9.06084	9.15541	3.80869	5.97852	9.03919	7.15076	6.20359	6.12928	4.8125	-21.5349
