# Supplementary material for: Machine learning-based identification and immune characterization of ferroptosis-related molecular clusters in osteoarthritis and validation
Source: Aging (Albany NY). 2024 May 29;16(11):9437–59. doi: 10.18632/aging.205875 (PMC11210262; doi:10.18632/aging.205875)
Supplement: Supplementary File 4 [file aging-16-205875-s006.xlsx]

## Sheet: Supplementary File 4
Supplementary File 4. Key genes and immune cell correlations.
Mixture	B cells naive	B cells memory	Plasma cells	T cells CD8	T cells CD4 naive	T cells CD4 memory resting	T cells CD4 memory activated	T cells follicular helper	T cells regulatory (Tregs)	T cells gamma delta	NK cells resting	NK cells activated	Monocytes	Macrophages M0	Macrophages M1	Macrophages M2	Dendritic cells resting	Dendritic cells activated	Mast cells resting	Mast cells activated	Eosinophils	Neutrophils	P-value	Correlation	RMSE
GSM6265690_Control	0.0201164	0.0105833	0.185458	0.00586248	0	0.0387876	0.00728361	0.00101248	0	0.0251835	0	0.00210377	0	0.150328	0.0609107	0.359916	0.0140828	0	0.105521	0	0	0.0128497	0	0.476859	0.878571
GSM6265691_Control	0.0262796	0.0175147	0	0	0.0509539	0.128905	0	0	0	0	0.0182423	0.0218127	0.0194922	0.00912835	0.22212	0.440283	0.005273	0	0.00800009	0.0183993	0	0.013595	0	0.365861	0.942923
GSM6265692_Control	0.00246179	0	0.263072	0	0	0.0400313	0.017463	0.00552528	0	0.0444615	0	0.00568096	0	0.197222	0.0394209	0.278431	0.0124561	0	0.0689681	0	0	0.024806	0	0.448771	0.896155
GSM6265693_Control	0.0489921	0	0.135654	0	0	0.0338779	0.0137127	0.0425226	0	0.119117	0	0.051416	0.008568	0	0.071821	0.219526	0.0212488	0	0.220263	0	0.00094187	0.0123392	0	0.512379	0.862879
GSM6265694_Control	0.0116321	0.00830685	0.175443	0	0	0.0465913	0	0.0371959	0	0.0277434	0	0	0.0591601	0.159366	0.015122	0.277692	0	0.00661614	0.0783333	0.0718346	0	0.0249634	0	0.386886	0.924892
GSM6265695_Control	0.0854603	0	0.108553	0	0	0.0965023	0	0.0322179	0.0241001	0.0144011	0	0.0530649	0.01291	0.0841228	0.03727	0.232188	0.0362152	0	0.121935	0.0217567	0.0111546	0.0281485	0	0.302793	0.957275
GSM6265696_Control	0.0243919	0	0	0	0	0.109756	0	0.0237077	0	0.0963232	0	0.0151564	0	0.0638267	0.0810843	0.374184	0.0176552	0	0.166194	0	0	0.0277204	0	0.319369	0.952791
GSM1337304_Control	0.0150027	0.00785208	0.00428219	0	0.0824592	0.057315	0.0344149	0	0	0.0514575	0.0301536	0	0.032202	0.251247	0.00956738	0.208598	0.00596326	0	0.187166	0.00782371	0	0.014496	0	0.636794	0.79737
GSM1337305_Control	0.00227671	0.00301559	0	0.0765029	0	0.00889632	0	0	0.0205785	0	0	0.0326161	0.037832	0.0186823	0.0191364	0.624175	0.0111143	0	0.119944	0	0	0.0252304	0	0.332047	0.958629
GSM1337306_Control	0.0502771	0.0327053	0.00423765	0	0	0.182039	0	0	0.0103113	0	0	0.0353336	0.0494723	0	0.0300628	0.344532	0.0379544	0	0.17074	0	0.0159309	0.0364041	0	0.245203	0.980209
GSM1337307_Control	0.0279757	0	0	0	0.0228797	0.013022	0.0441633	0.00965397	0	0.0682357	0.0490096	0	0.0939005	0.0133843	0.00598914	0.0357787	0	0	0	0.0504865	0	0.565521	0	0.643848	0.775154
GSM1337308_Control	0.0364625	0.015068	0.0434482	0.0189708	0	0.0784612	0.0426285	0.0150441	0.00728544	0.0608351	0	0.0117303	0.0468649	0	0.061958	0.220865	0.0506259	0	0.0927466	0.164858	0	0.0321466	0	0.22515	0.993199
GSM1337309_Control	0	0.0173758	0	0	0	0.0630683	0	0	0.0167268	0	0	0.0162858	0.0456729	0.0597357	0.0179647	0.318239	0.0281993	0	0.416732	0	0	0	0	0.443262	0.898756
GSM1337310_Control	0	0.0308005	0.00500861	0.00408495	0	0.0106699	0	0.000674941	0.0146121	0.0251754	0	0.00536585	0	0.27986	0.0300562	0.520771	0	0	0.0729198	0	0	0	0	0.580883	0.814344
GSM1337311_Control	0.00839378	0.0277861	0.0304001	0	0	0.0645499	0	0.0050064	0.000470603	0.0265481	0	0.0220316	0.0182773	0	0.0241089	0.489252	0.0206696	0	0.1356	0.125997	0	0.000908733	0	0.332635	0.95433
GSM1337312_Control	0	0.0195161	0.0114708	0	0	0.0941622	0	0.0201997	0.00782242	0.0192936	0	0.0355639	0.00793414	0	0.0284953	0.48965	0.0301287	0	0.0199415	0.209236	0	0.00658488	0	0.259698	0.994664
GSM1337313_Control	0	0.0152138	0.0104701	0	0	0.130356	0	0.0188503	0	0.00141191	0	0.0488938	0.0264558	0.00879437	0.027636	0.560384	0.0050025	0	0	0.134969	0	0.0115614	0	0.307349	0.969531
GSM1332201_Control	0.0340035	0	0	0	0	0.11352	0	0.0332941	0	0	0	0.0430235	0.035058	0	0.0277232	0.465948	0.00320915	0	0.092558	0.0386234	0.0235253	0.0895131	0	0.236573	0.993336
GSM1332202_Control	0.0109102	0.018744	0.00183689	0	0	0.0735384	0	0.0118019	0.0272392	0.00608397	0	0.0633859	0.0134874	0.000698268	0.0253489	0.481084	0.000202638	0	0	0.228976	0.00760035	0.0290624	0	0.389364	0.928711
GSM1332203_Control	0	0.0541883	0	0	0	0.172159	0	0	0.0102239	0.0545276	0	0.0481332	0	0	0.0332941	0.356468	0.0508744	0	0	0.208769	0	0.0113622	0	0.245588	0.992525
GSM1332204_Control	0	0.0772925	0.00477917	0	0	0.141159	0	0	0	0.0571119	0	0.0330624	0.0190996	0.0366301	0.0292548	0.424304	0.0102194	0	0	0.149117	0.00114844	0.0168221	0.03	0.177547	1.02161
GSM1332205_Control	0.048345	0	0.00838186	0	0	0.073034	0	0	0.0137788	0.0421495	0	0.0227277	0.050635	0.015239	0.0405646	0.312672	0.0172402	0	0	0.346858	0	0.00837448	0.01	0.209305	1.03265
GSM1332206_Control	0.0250043	0	0.0049969	0	0	0.131937	0	0.0299292	0	0.0328328	0	0.0748314	0.00265552	0	0.0153454	0.353607	0	0.00332667	0	0.267995	0.0398077	0.0177307	0	0.247143	1.00233
GSM1332207_Control	0.0722161	0	0	0	0	0.144775	0	0.00336524	0.00553529	0.0799483	0.0121882	0	0.0196954	0.0321822	0.131504	0.267046	0.0183564	0	0.103551	0.0720256	0	0.0376112	0.05	0.156899	1.02287
GSM1332208_Control	0.0621074	0	0	0	0	0.18458	0	0.0471065	0.00841333	0.0221066	0.0435513	0.00438452	0	0	0.058759	0.194784	0.0160041	0	0	0.347634	0	0.010569	0.03	0.170623	1.04552
GSM1332209_Control	0.00803911	0.0287106	0	0	0	0.0827224	0	0	0.00238033	0.00767102	0	0.0157245	0.00669403	0.153125	0.0252758	0.519527	0.000876851	0	0.138471	0.00553142	0	0.00525102	0	0.333593	0.957826
GSM1332210_Control	0	0.0556638	0.00607123	0.00653253	0	0.16649	7.36252e-05	0	0	0.0889087	0	0.0596622	0	0.0143198	0.113186	0.31602	0.0272028	0	0.102124	0.041618	0	0.00212733	0	0.406214	0.913203
GSM2048265_Control	0.0712572	0	0.00287062	0	0	0.0641177	0	0.000914146	0.0474831	0.0157005	4.9597e-06	0.0110377	0.011341	0	0.0559054	0.40992	0.0381944	0	0.251281	0	0	0.0199725	0	0.259631	0.980531
GSM2048266_Control	0.0460451	0.0761617	0.0335098	0.0718525	0	0.0508849	0	0.0117049	0.0477491	0	0	0.0406224	0.0498621	0	0.0779847	0.213768	0.0487045	0	0.23115	0	0	0	0.03	0.182543	1.00454
GSM2048267_Control	0.00633011	0.0329829	0.0309213	0	0.0165068	0.109518	0.0350101	0	0	0.133185	0	0	0.00998403	0.0187591	0.0718025	0.313223	0.0262944	0	0.189645	0	0	0.00583883	0	0.422928	0.906064
GSM2048268_Control	0	0.0479395	0.00249924	0.00379494	0	0.0502014	0	0	0.0508296	0	0	0.0370976	0.083141	0	0.0244306	0.484669	0.046078	0	0.157813	0	0	0.0115058	0	0.463053	0.886333
GSM2048269_Control	0	0.0720724	0.00236901	0	0.00238303	0.0438315	0	0.0126833	0.00918623	0.0527998	0	0.0270596	0.0300955	0.0294692	0.0248534	0.448278	0.062358	0	0.160759	0.0107199	0	0.0110824	0	0.48759	0.874338
GSM2048270_Control	0.0477931	0.0520452	0	0	0.00442697	0.0861288	0	9.1668e-05	0.00987517	0.0106261	0	0.0222981	0.0500949	0	0.0281884	0.391513	0.037987	0	0.19916	0.0277919	0	0.0319795	0	0.486011	0.875702
GSM2048271_Control	0.0202239	0.0094527	0	0.012196	0	0.0567613	0	0.0160859	0.0269172	0.010034	0	0.0297651	0.0507038	0.0306986	0.0222776	0.433877	0.0260857	0	0.237931	0.00848214	0	0.0085077	0	0.413799	0.910855
GSM6265697_Treat	0	0.0565347	0.00538587	0	0	0.0424744	0.0244326	0.0108405	0.000598942	0.0492118	0.00402276	0	0.0275112	0.0148798	0.0681535	0.480459	0.0182431	0	0.161958	0	0	0.0352935	0	0.47423	0.880407
GSM6265698_Treat	0.0243621	0.060351	0.119456	0	0	0.0236342	0.0210369	0.0322587	0	0.121768	0	0	0	0	0.0544085	0.257694	0.0230989	0	0	0.244011	0.000801427	0.0171196	0	0.530682	0.848676
GSM6265699_Treat	0.012607	0.0407081	0.013263	0	0.0346065	0	0	0.0108132	0.0855055	0.0781022	0	0.0935562	0.0597019	0.0724778	0.0381056	0.283026	0.0694865	0	0.00242758	0.0768309	0.0287816	0	0.03	0.183139	1.01208
GSM6265700_Treat	0.000925031	0.0603669	0.0718032	0	0	0.0717494	0	0.0198618	0.00807412	0.0700229	0	0.0313193	0.00106348	0	0.0243131	0.46009	0.016436	0	0.0757458	0.0747244	0	0.0135047	0	0.483124	0.876143
GSM6265701_Treat	0.0353248	0.0191068	0	0	0	0.0200629	0	0.0221634	0.0160221	0.0219284	0.0097047	0	0.00323756	0.274173	0.0185613	0.400819	0	0	0.148893	0	0	0.0100029	0	0.621942	0.791113
GSM6265702_Treat	0.031713	0	0.0276116	0	0.0117652	0.0486571	0.00695371	0.0483149	0.00564258	0.0748827	0	0.00568154	0	0.113998	0.0290005	0.417514	0.0068197	0	0.148714	0	0	0.0227308	0	0.504363	0.865932
GSM6265703_Treat	0.0267634	0.00340214	0.0657673	0.0886603	0	0	0	0.0166066	0.00178204	0.078337	0	0.0358798	0.0379599	0	0.0424241	0.433875	0.0193178	0	0.0910407	0.0581844	0	0	0	0.430352	0.901944
GSM6265704_Treat	0.020225	0.0194829	0	0	0.00447041	0	0.00343837	0.0200024	0.00107181	0.0248312	0.00669171	0	0	0.0952332	0.0203913	0.608866	0.010157	0	0.137601	0	0	0.0275372	0	0.4721	0.883176
GSM6265705_Treat	0.0225875	0.00751157	0.067259	0	0	0.0978896	0.00757879	0.0313223	0.00174976	0.0248567	0	0.00998589	0.0451108	0.0882295	0.0352935	0.336224	0.025087	0	0.190481	0	0	0.00883265	0	0.417837	0.908367
GSM1337314_Treat	0.0349528	0.01864	0.12629	0.00490548	0	0.0505732	0.0250918	0.0658096	0.00902472	0.13528	0	0	0	0	0.188953	0.317184	0.00132039	0	0.00384718	0.0073448	0	0.010784	0	0.404587	0.91705
GSM1337315_Treat	0.074332	0	0	0	0	0.0812955	0.00142563	0.007117	0	0.00274854	0	0.0572603	0.00385653	0.0104776	0.105894	0.446464	0.0153938	0	0.188783	0	0	0.00495215	0	0.392962	0.920491
GSM1337316_Treat	0.0433611	0.000684326	0.177698	0	0.0585999	0.0318133	0.0188808	0.0332777	0	0.155398	0	0	0	0.077955	0.063787	0.307164	0	0	0.00267102	0.00232956	0	0.0263815	0	0.564578	0.831902
GSM1337317_Treat	0.0137004	0.0636218	0.102531	0.0116572	0.00669146	0.0694771	0.0247232	0.0627334	0	0.0843687	0	0	0.0137296	0	0.1484	0.317863	0.0189878	0	0.0535	0	0	0.00801513	0	0.502692	0.86634
GSM1337318_Treat	0.0487313	0	0.168179	0	0	0	0	0.0312097	0.0148822	0.0326815	0.00268638	0	0	0.389823	0.0480185	0.201748	0.00391564	0	0.0367883	0.0178729	0	0.00346287	0	0.528152	0.84899
GSM1337319_Treat	0.0216316	0.0258651	0.209329	0.0646924	0	0	0.0286019	0.040427	0	0.0991556	0	0	0.00260715	0.0386704	0.0793289	0.334731	0	0	0.0528681	0	0	0.00209224	0	0.511626	0.859464
GSM1337320_Treat	0.129401	0.053718	0.161362	0.013333	0	0.065946	0.0173281	0.0882229	0.012641	0.0849423	0	0	0.000962478	0.0385131	0.0444107	0.227766	0	0	0.055567	0	0	0.00588624	0	0.689798	0.756335
GSM1337321_Treat	0.0170443	0.0250306	0.0845199	0.0791685	0	0	0.0607821	0.0625396	0	0.124265	0	0.0187567	0.0457754	0.00561879	0.10705	0.298572	0.0119805	0	0.0533291	0	0	0.00556814	0	0.607041	0.817484
GSM1337322_Treat	0	0	0.307928	0	0.00476863	0.00621907	0.0309238	0.0303677	0	0.0650793	0	0.0215852	0.0021942	0.0341591	0.0519046	0.38069	0	0	0.0298477	0	0.00547462	0.0288581	0	0.684563	0.741347
GSM1337323_Treat	0.0622955	0.0490956	0.168244	0	0.0358091	0	0.0117549	0.0484695	0.00238007	0.120866	0	0	0	0.221407	0.0921884	0.1311	0.00892554	0	0.0287179	0.0187457	0	0	0	0.619046	0.797908
GSM1337324_Treat	0.0123576	0.0172537	0	0	0	0.0392474	0	0.0119646	0.0041401	0.0363515	0	0.00577361	0.0312761	0	0.0429601	0.694276	0.00907999	0	0.0608433	0.0320349	0	0.00244117	0	0.457985	0.892147
GSM1337325_Treat	0	0	0.408755	0	0	0.0509726	0	0.0347554	0	0.0126268	0	0.0231271	0.00683262	0.061136	0.0520431	0.274226	0.0157762	0	0.0280357	0	0	0.031713	0	0.566999	0.826395
GSM1337326_Treat	0.0139461	0	0.070294	0	0.00285679	0.143739	0	0.0239768	0	0	0	0.0139108	0.0343748	0.0763271	0.0857043	0.372909	0.0281966	0	0	0.112182	0.0106333	0.0109502	0	0.424028	0.905138
GSM1337327_Treat	0.0355782	0.00735839	0.0364006	0	0	0.0592203	0.00114516	0.024724	0.00946079	0.0880576	0	0.00939391	0.00811852	0.111483	0.0389056	0.36824	0.0114726	0	0.171626	0.00790662	0	0.0109086	0	0.353765	0.937479
GSM1337328_Treat	0	0.0610223	0.00304809	0	0	0.0588827	0	0.038453	0	0.0547095	0	0.0198342	0.041889	0.0525696	0.0438198	0.413804	0.033394	0	0.161323	0	0	0.0172508	0	0.31788	0.953595
GSM1337329_Treat	0.0255822	0	0.074578	0	0	0.0470438	0	0.000456049	0.00708253	0.05016	0	0.00805093	0.0514892	0	0.0361726	0.345944	0.0246443	0	0.319273	0	0	0.00952337	0	0.395494	0.919498
GSM1337330_Treat	0.0226244	0.0747718	0.156393	0.00460215	0	0.0585692	0.0155027	0.0464557	0	0.109969	0	0.0033579	0	0.050049	0.0317488	0.178801	0.0195983	0	0.216334	0	0	0.0112234	0	0.650271	0.791483
GSM1337331_Treat	0.00483893	0.0220849	0.0389719	0	0.00316871	0.0352398	0.0131411	0.0179249	0	0.0353375	0.00330647	0	0	0	0.0313145	0.310215	0.0255804	0	0.45618	0	0	0.0026957	0	0.528167	0.849794
GSM1337332_Treat	0.0267278	0	0	0	0	0.0611795	0	0	0.00264765	0.0201133	0	0.0257575	0.040885	0.0331912	0.0304283	0.540452	0.0211061	0	0.173403	0	0	0.0241082	0	0.311561	0.96454
GSM1337333_Treat	0	0.0577726	0.0373062	0	0.00172949	0.0420531	0	0.00645476	0.0120333	0.0384521	0	0.0116588	0.0146531	0.000257911	0.0195076	0.447807	0.0432	0	0.259598	0	0	0.00751635	0	0.509633	0.862858
GSM1337334_Treat	0.0359548	0	0.00837132	0	0	0.0679785	0.00713801	0.0263249	0	0.00942215	0.0040683	0.0104434	0	0.0697771	0.022684	0.464673	0.00810921	0	0.23836	0	0	0.0266959	0	0.457711	0.889035
GSM1337335_Treat	0.0256959	0	0.0336965	0.00530234	0	0.00349558	0.00454174	0.0198001	0.00524633	0.0575187	0	0.0302247	0.00087864	0.049745	0.024341	0.456039	0.0196003	0	0.252843	0	0	0.011031	0	0.542538	0.844122
GSM1337336_Treat	0.0199133	0.00804244	0.0134806	0	0	0.0274667	0	0.00693613	0.00977662	0.00535994	0.00365027	0.00104756	0.0112948	0.0919225	0.0142609	0.648483	0.00475168	0	0.123241	0	0	0.010373	0	0.4925	0.871906
GSM1332211_Treat	0.00358317	0.0166784	0.00313988	0	0	0	0.00530356	0.0423461	0.0148052	0.0711421	0	0	0	0.225838	0.0284416	0.421436	0	0	0.148965	0	0	0.018321	0	0.699442	0.7435
GSM1332212_Treat	0.004254	0.0164809	0.0074952	0	0	0.00465573	0.00514502	0.0185915	0.00537527	0.0410479	0	0	0	0.206166	0.0147338	0.411995	0.00601026	0	0.255942	0	0	0.00210834	0	0.630607	0.786737
GSM1332213_Treat	0	0.0296129	0.0994304	0.00010381	0.0143871	0.00405126	0.02568	0.0299209	0.00551511	0.0313338	0	0.0281965	0.036065	0.0137609	0.0288449	0.433253	0.0317914	0	0.183466	0	0	0.00458721	0	0.337386	0.945457
GSM1332214_Treat	0.0432132	0	0.0376191	0	0	0.0254214	0	0.0355974	0.00287236	0.058488	0	0.00343883	0.0133373	0.159516	0.0361614	0.393024	0.00795768	0	0.157733	0	0	0.0256207	0	0.496888	0.868692
GSM1332215_Treat	0.00911094	0.0291527	0.0661706	0	0	0.0515405	0.00320589	0.00426414	0.00106684	0.0477103	0	0	0.0742952	0.112419	0.0190924	0.208182	0.00425516	0	0.369534	0	0	0	0	0.526913	0.85313
GSM1332216_Treat	0	0.0125287	0.00344161	0.000124441	0	0.0214637	0	0.0157206	0.0108946	0	0	0.0225664	0.149331	0	0.0363001	0.375732	0.0228235	0	0.328337	0	0	0.000737066	0	0.56128	0.832445
GSM1332217_Treat	0.0197141	0.0169314	0.0477279	0	0.0106251	0.000934075	0	0	0.0287084	0.0810118	0	0	0	0.19786	0.0373457	0.357633	0.0131507	0	0.175996	0	0	0.0123624	0	0.53602	0.847671
GSM1332218_Treat	0.0221611	0	0.0344389	0	0.00982001	0.0115057	0	0.0116843	0.00231371	0.0303051	0	0.0101427	0.0099826	0.0688867	0.0224311	0.598069	0.00714047	0	0.137956	0	0	0.0231626	0	0.548551	0.837051
GSM1332219_Treat	0.0196976	0.0319996	0.042005	0	0	0.061005	0	0.0105949	0.0126089	0.0449745	0	0.0126054	0	0.0197282	0.0293457	0.319722	0.0163969	0	0.362714	0	0	0.0166023	0	0.583911	0.822246
GSM1332220_Treat	0	0.0536288	0.130631	0	0.00497384	0.0501139	0	0.00268391	0.0199705	0.0260103	0	0	0.000110609	0	0.0470922	0.403416	0.0613566	0	0.186806	0	0	0.0132066	0	0.482182	0.87697
GSM1332221_Treat	0.013596	0.0264991	0.160961	0.0260415	0	0.031535	0.0277808	0.0666345	0	0.0178665	0	0.0238739	0.0684138	0.0657956	0.0718961	0.288273	0.0152286	0	0.0689897	0	0	0.0266143	0	0.489891	0.8736
GSM1332222_Treat	0.0436184	0.0633779	0.106979	0	0.0689017	0.00283959	0.0345769	0.108368	0	0.0828128	0	0.00218538	0.0144802	0.024324	0.0377666	0.311168	0.0189796	0	0.0555199	0	0	0.0241025	0	0.534682	0.854016
GSM1332223_Treat	0.0263706	0	0.10385	0.0264183	0	0	0	0.0447163	0.00335265	0.0774873	0	0	0.018528	0.174762	0.0780774	0.343368	0	0	0	0.0752529	0	0.027816	0	0.628221	0.793521
GSM1332224_Treat	0	0.119421	0.228679	0	0.0184927	0.036346	0.0111696	0.0330606	0	0.075688	0	0	0.0408619	0.0382106	0.0859408	0.247374	0.00228137	0	0.0473205	0	0	0.0151538	0	0.570208	0.824027
GSM1332225_Treat	0.0152932	0.0188024	0.20697	0.0529505	0	0.104987	0.00128313	0.0186223	0	0.0228322	0.0154451	0	0	0.0313488	0.104794	0.335341	0.00498899	0	0.0569263	0	0	0.00941612	0	0.496539	0.867687
GSM1332226_Treat	0.0546628	0	0.174046	0	0.0347178	0	0.020293	0.0271753	0	0.0631466	0	0.012972	0.0196049	0	0.0848989	0.311972	0.0353892	0	0.102105	0	0	0.0590164	0	0.571933	0.830403
GSM1332227_Treat	0.031877	0	0.103977	0	0	0.0805847	0.0022723	0.0293967	0.0103749	0.0652898	0	0	0.00544174	0.00580921	0.0485659	0.508188	0	0.00411406	0.0751133	0	0	0.0289955	0	0.611185	0.808063
GSM1332228_Treat	0.00794219	0.0447442	0.242469	0.034853	0.012446	0.00939706	0.0371581	0.0278452	0	0.109155	0.00647458	0	0.000228871	0.0832121	0.0391331	0.282046	0.00452278	0	0.0437902	0	0	0.0145824	0	0.463358	0.885829
GSM1332229_Treat	0.00899065	0.0042452	0.17185	0.0328481	0	0.00107375	0.03793	0.0199157	0	0.155506	0	0	0	0.113306	0.0300467	0.316465	0.0156756	0	0.0748254	0	0	0.0173213	0	0.581162	0.825093
GSM1332230_Treat	0	0.0194969	0.242797	0.0183722	0	0.0463943	0.0107507	0.0273624	0	0.00461254	0	0.0243134	0.0307969	0.0431829	0.103696	0.26123	0.0180648	0	0.117559	0	0	0.0313707	0	0.464461	0.884969
GSM2048272_Treat	0.0141112	0.0199801	0	0	0	0.0773756	0	0.0245199	0.0269472	0.0236698	0	0.00038234	0.00461239	0	0.0827585	0.507739	0.0110465	0	0.195801	0	0	0.0110559	0	0.499784	0.866735
GSM2048273_Treat	0	0.0967441	0.0387694	0.0242191	0.0115483	0.0275473	0	0.0092404	0.0204938	0.0154345	0	0.0437261	0.0131698	0.00956017	0.0507431	0.33611	0.0331854	0	0.219837	0.029783	0	0.0198888	0	0.431711	0.901572
GSM2048274_Treat	0.0679756	0	0.0714239	0.00986851	0	0.016959	0	0.06955	0	0.0790044	0	0	0	0	0.0864624	0.377088	0.0166259	0	0.188241	0	0	0.0168006	0	0.564301	0.838218
GSM2048275_Treat	0.00351448	0.00826246	0.439525	0	0	0.0546009	0.0217592	0.0380036	0	0.0420043	0	0.00402314	0.00879963	0	0.0277599	0.260617	0	0	0.0780786	0	0.00414385	0.00890836	0	0.631971	0.775526
GSM2048276_Treat	0.0219486	0	0.167422	0	0	0.060331	0.0474562	0.0226188	0	0.0811195	0	0	0	0.0350614	0.113902	0.340207	0.0193791	0	0.0644024	0	0	0.0261526	0	0.566588	0.83256
GSM2048277_Treat	0.0526876	0	0.0140058	0	0.0763265	0.00780586	0.0279889	0.0150403	0	0.0866497	0.0644591	0	0.0959375	0.12511	0.00875848	0.154457	0.00781847	0	0.00139698	0.0269157	0.0122061	0.222436	0	0.285526	0.977333
GSM2048278_Treat	0.0204372	0.00985706	0.00915927	0	0	0.0713962	0.00265177	0.0119707	0	0.0198248	0.00587704	0	0.0668029	0.137709	0.0350832	0.50744	0.00858236	0	0.0898978	0	0	0.00331049	0	0.324069	0.961025
GSM2048279_Treat	0.0181852	0.022847	0.140255	0	0.0378535	0.0335451	0.0401847	0.0554658	0	0.073388	0	0	0.0167653	0	0.104418	0.323066	0.0235339	0	0.0899056	0	0	0.020587	0	0.413155	0.90987
GSM2048280_Treat	0	0.052456	0.136173	0	0.0184614	0.0199866	0	0.00239138	0	0.0310414	0	0.00205902	0	0.052391	0.0505851	0.452798	0.0374509	0	0.114641	0	0	0.0295648	0	0.445586	0.894924
GSM2048281_Treat	0.0136819	0.0181045	0.154987	0.0379633	0	0.0626524	0.034792	0.0375754	0	0.0463278	0	0	0.011227	0.0603129	0.064084	0.360701	0.0122594	0	0.0498941	0.00985868	0	0.0255785	0	0.459231	0.888062
GSM2048282_Treat	0.023458	0	0.0480847	0	0	0.0219363	0	0.0333605	0.0112168	0.0321708	0	0.00835939	0	0.388613	0.0260385	0.311471	0	0	0.0858098	0.00491217	0	0.00456952	0	0.409419	0.921556
GSM2048283_Treat	0.00495261	0.00111464	0.215282	0.037021	0.0139793	0	0.0141219	0.0458424	0	0.107239	0	0.00604388	0.0271994	0.148682	0.0710059	0.284617	0.000664662	0	0.0108539	0.00437614	0	0.00700466	0	0.618516	0.797142
GSM2048284_Treat	0	0.0205622	0.00641504	0	0.00233111	0.020542	0	0.0172498	0.00104408	0.0393245	0	0.0222624	0.0231978	0.187592	0.0155143	0.521839	0.00830039	0	0	0.10052	0	0.0133058	0	0.441137	0.903321
GSM2048285_Treat	0.00438202	0.00471541	0.0595982	0	0	0.101057	0.0194404	0.0613062	0	0.0841487	0	0.000978683	0	0.0606303	0.0678012	0.456989	0.0117279	0	0.0633815	0	0	0.0038431	0	0.444333	0.895337
GSM2048286_Treat	0.0173717	0.0651305	0	0	0.00535404	0.0560763	0	0	0.019495	0.0318998	0	0.0457624	0.0122448	0.0617085	0.0771228	0.366061	0.0223477	0	0.205599	0	0	0.0138271	0	0.266774	0.976112
GSM2048287_Treat	0.0216293	0.0401007	0.133861	0.0151951	0.0162893	0	0.00537731	0.0915151	0	0.126664	0	0.00683426	0.0117562	0	0.090889	0.339705	0.00861698	0	0.0826473	0	0	0.00892034	0	0.531621	0.852832
