# Supplementary material for: Machine learning-based identification and immune characterization of ferroptosis-related molecular clusters in osteoarthritis and validation
Source: Aging (Albany NY). 2024 May 29;16(11):9437–59. doi: 10.18632/aging.205875 (PMC11210262; doi:10.18632/aging.205875)
Supplement: Supplementary File 6 [file aging-16-205875-s008.xlsx]

## Sheet: Supplementary File 6
Supplementary File 6. GSVA scores.
Tag	GSM6265697_Treat	GSM6265698_Treat	GSM6265699_Treat	GSM6265700_Treat	GSM6265701_Treat	GSM6265702_Treat	GSM6265703_Treat	GSM6265704_Treat	GSM6265705_Treat	GSM1337314_Treat	GSM1337315_Treat	GSM1337316_Treat	GSM1337317_Treat	GSM1337318_Treat	GSM1337319_Treat	GSM1337320_Treat	GSM1337321_Treat	GSM1337322_Treat	GSM1337323_Treat	GSM1337324_Treat	GSM1337325_Treat	GSM1337326_Treat	GSM1337327_Treat	GSM1337328_Treat	GSM1337329_Treat	GSM1337330_Treat	GSM1337331_Treat	GSM1337332_Treat	GSM1337333_Treat	GSM1337334_Treat	GSM1337335_Treat	GSM1337336_Treat	GSM1332211_Treat	GSM1332212_Treat	GSM1332213_Treat	GSM1332214_Treat	GSM1332215_Treat	GSM1332216_Treat	GSM1332217_Treat	GSM1332218_Treat	GSM1332219_Treat	GSM1332220_Treat	GSM1332221_Treat	GSM1332222_Treat	GSM1332223_Treat	GSM1332224_Treat	GSM1332225_Treat	GSM1332226_Treat	GSM1332227_Treat
hubgene	0.0882004	0.421898	-0.540731	0.19358	-0.303752	0.0920447	0.174041	0.276267	0.249467	-0.0362255	-0.310667	-0.162524	0.317279	-0.292182	0.203251	0.0467202	-0.0127613	0.25469	0.00269506	-0.362559	-0.145606	0.0659718	-0.0529017	-0.385101	0.0773533	-0.0517363	-0.296803	0.138075	-0.129992	-0.363911	-0.33625	0.491999	-0.400911	-0.349027	0.312873	-0.250659	0.223654	-0.285684	-0.155915	-0.182711	-0.473679	0.0784398	0.146312	-0.34121	-0.396729	0.0272524	0.403372	0.15085	0.338369
[truncated: 19 more columns]
