# Supplementary material for: Machine learning-based identification and immune characterization of ferroptosis-related molecular clusters in osteoarthritis and validation
Source: Aging (Albany NY). 2024 May 29;16(11):9437–59. doi: 10.18632/aging.205875 (PMC11210262; doi:10.18632/aging.205875)
Supplement: Supplementary File 7 [file aging-16-205875-s009.xlsx]

## Sheet: Supplementary File 7
Supplementary File 7. Immune scores.
4	68
NAME	Description	GSM6265697_Treat	GSM6265698_Treat	GSM6265699_Treat	GSM6265700_Treat	GSM6265701_Treat	GSM6265702_Treat	GSM6265703_Treat	GSM6265704_Treat	GSM6265705_Treat	GSM1337314_Treat	GSM1337315_Treat	GSM1337316_Treat	GSM1337317_Treat	GSM1337318_Treat	GSM1337319_Treat	GSM1337320_Treat	GSM1337321_Treat	GSM1337322_Treat	GSM1337323_Treat	GSM1337324_Treat	GSM1337325_Treat	GSM1337326_Treat	GSM1337327_Treat	GSM1337328_Treat	GSM1337329_Treat	GSM1337330_Treat	GSM1337331_Treat	GSM1337332_Treat	GSM1337333_Treat	GSM1337334_Treat	GSM1337335_Treat	GSM1337336_Treat	GSM1332211_Treat	GSM1332212_Treat	GSM1332213_Treat	GSM1332214_Treat	GSM1332215_Treat	GSM1332216_Treat	GSM1332217_Treat	GSM1332218_Treat	GSM1332219_Treat	GSM1332220_Treat	GSM1332221_Treat	GSM1332222_Treat	GSM1332223_Treat	GSM1332224_Treat	GSM1332225_Treat	GSM1332226_Treat
StromalScore	StromalScore	2102.87	1979.02	1404.09	1972.13	2145.68	2225.09	2078.2	1898.04	1905.95	1986.73	2148.3	2093.43	1765.95	2018.61	2248.68	1714.8	2169.79	2025.96	1894.52	2139.26	1808.45	2117.38	1917.71	1728.7	2121.45	1951.71	1946.38	1816.03	1874.03	2002.81	2338.24	1847.13	2249.38	1913.14	1704.7	2249.81	1857.21	2007.78	1980.89	1821.71	1970.02	2004.85	1994.04	1983.55	2528.76	2091.53	1964.68	1989.68
ImmuneScore	ImmuneScore	2694.32	2357.15	745.772	2185.4	2023.57	2590.02	2196.82	2227.66	2192.04	2438.9	1258.43	2592.72	2866.52	1186.08	2762.84	3172.65	3234.6	2714.13	2746.42	1446.9	2589.01	2539.32	1662.92	1777.74	1882.42	2509.59	1129.09	1888.79	2016.29	1868.25	1477.03	1964.47	1604.96	2124.83	1812.99	1612.62	2123.02	1940.04	1936.64	2210.61	1912.97	1654.11	2822.04	3214.36	2866.94	3092.95	3034.46	2270.98
ESTIMATEScore	ESTIMATEScore	4797.2	4336.17	2149.87	4157.52	4169.25	4815.1	4275.02	4125.7	4098	4425.63	3406.73	4686.15	4632.47	3204.69	5011.52	4887.45	5404.39	4740.08	4640.94	3586.16	4397.46	4656.7	3580.63	3506.44	4003.87	4461.3	3075.47	3704.82	3890.32	3871.06	3815.27	3811.6	3854.33	4037.97	3517.69	3862.42	3980.23	3947.82	3917.54	4032.33	3882.99	3658.95	4816.08	5197.91	5395.71	5184.47	4999.14	4260.66
TumorPurity	TumorPurity	0.258662	0.32339	0.605372	0.34809	0.346476	0.256122	0.33187	0.352465	0.356268	0.310936	0.449085	0.274372	0.28194	0.475382	0.228149	0.245842	0.171653	0.266751	0.280747	0.425399	0.314863	0.278526	0.426133	0.43596	0.369143	0.305956	0.491983	0.409572	0.384582	0.38719	0.394728	0.395223	0.389453	0.364487	0.434473	0.388359	0.372366	0.376778	0.380891	0.365258	0.385576	0.415704	0.255983	0.201428	0.172909	0.20336	0.229918	0.333858
[truncated: 20 more columns]
