# Supplementary material for: Machine learning-based identification and immune characterization of ferroptosis-related molecular clusters in osteoarthritis and validation
Source: publisher site journal article supplement (doi:10.18632/aging.205875), 2024-05-29
Supplement: Supplementary file [file aging-v16i11-205875-supplementary-material-SD1.pdf]

**SUPPLEMENTARY FIGURES**

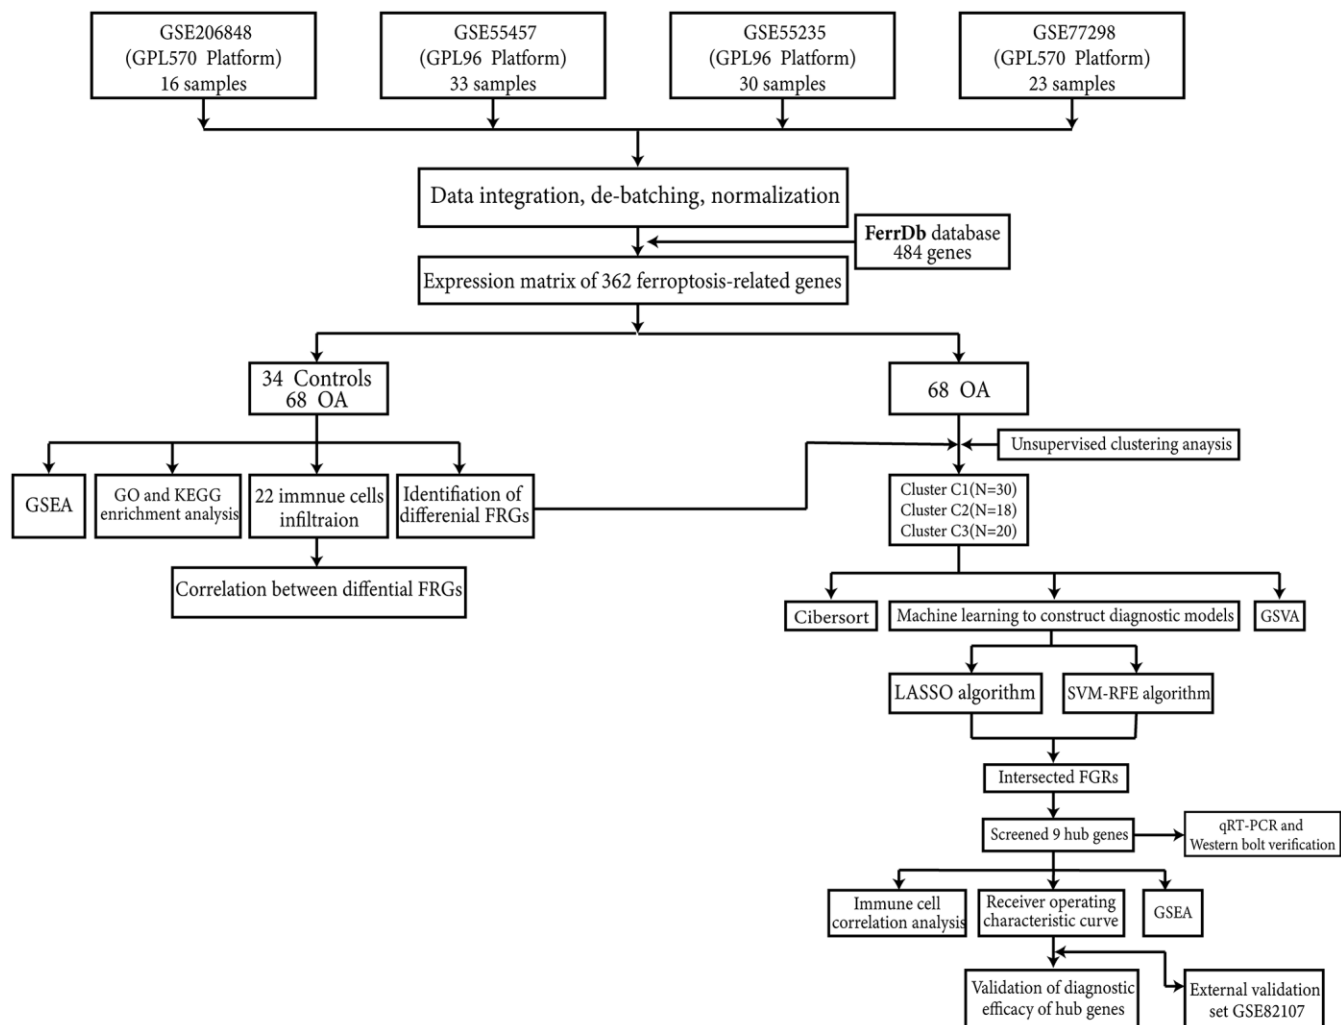

**Supplementary Figure 1. The overall flow chart for this analysis.**

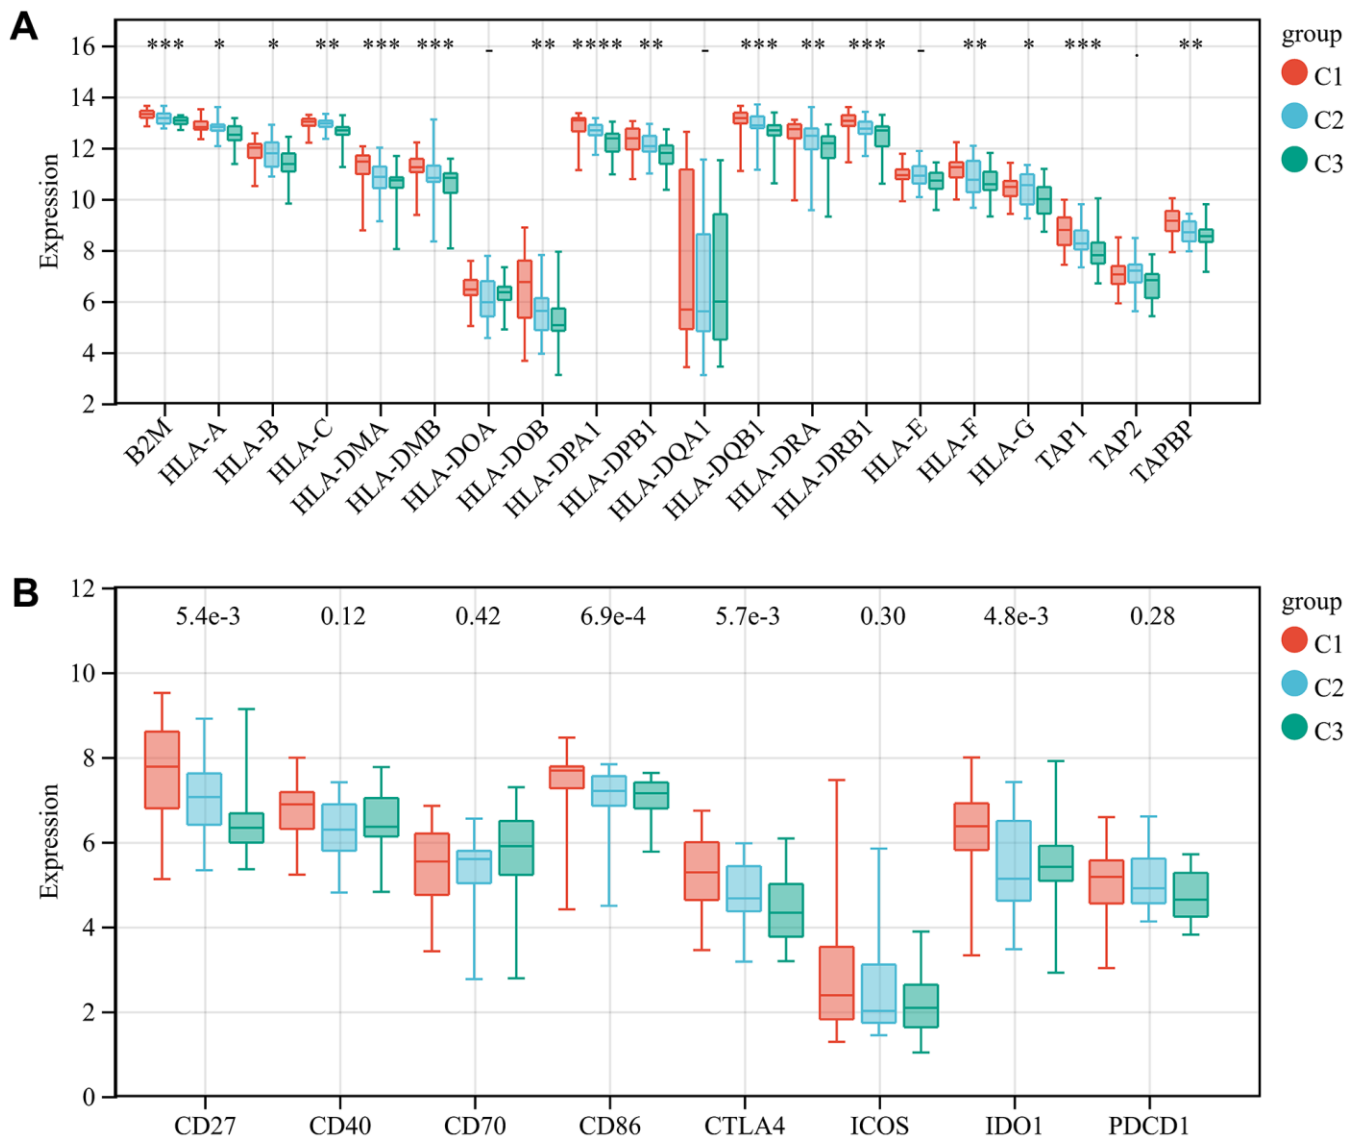

**Supplementary Figure 2. Significance analysis of immune checkpoint and HLA family genes in different subclusters.** The distribution of expression levels of HLA family genes (A) and immune checkpoint genes (B) in samples of different subtype groups is displayed. pvalue<0.0001: “\*\*\*\*”, pvalue<0.001: “\*\*\*”, pvalue<0.01: “\*\*”, pvalue<0.05: “\*”.
