# Supplementary material for: Machine learning-based identification and immune characterization of ferroptosis-related molecular clusters in osteoarthritis and validation
Source: publisher site journal article supplement (doi:10.18632/aging.205875), 2024-05-29
Supplement: Supplementary file [file aging-v16i11-205875-supplementary-material-SD2.pdf]

## SUPPLEMENTARY TABLES

**Supplementary Table 1. Information on the training datasets.**

| Data number | Platform information | Osteoarthritis group | Control group | Species      |
|-------------|----------------------|----------------------|---------------|--------------|
| GSE206848   | GPL570               | 9                    | 7             | Homo sapiens |
| GSE55457    | GPL96                | 23                   | 10            | Homo sapiens |
| GSE55235    | GPL96                | 20                   | 10            | Homo sapiens |
| GSE77298    | GPL570               | 16                   | 7             | Homo sapiens |

**Supplementary Table 2. Sequences of primers used for real-time PCR.**

| Gene symbol   | Sequence (5' - 3')         |
|---------------|----------------------------|
| GABARAPL1-F   | TTCTGGTTGCACAATACTGGATGCC  |
| GABARAPL1-R   | CCGATAAATAACACCTTCTGCCCC   |
| SAT1-F        | AGAGGTGCTTCTGATCTGTCCAGTG  |
| SAT1-R        | ATGGAGGTTGTCATCTACAGCAGCA  |
| EGFR-F        | TGACTACCAGCAGGACTTCTTTCCC  |
| EGFR-R        | TCCTCCGTGGTCATGCTCCAATAAA  |
| ELOVL5-F      | GCACATTCCCTCTTGGTTGGTTGTA  |
| ELOVL5-R      | TGGTCCTTCAGGTGGTCTTTCCTTC  |
| TBK1-F        | AGTGAATCAAACATACCATGACCCC  |
| TBK1-R        | AGAGCCAAACCTTTCTAAAATGTGGT |
| TRIM26-F      | TGACTTTCACCAACGCAGAGTCACA  |
| TRIM26-R      | CAGATGTCAGGGCTCAGGGTCTTAG  |
| SLC39A7-F     | TGTGGGTTCTCAGTGGAATTGTTGC  |
| SLC39A7-R     | GAACGCTCTTGTCTTCCATGTCCATG |
| PTPN6-F       | CAGAAGCAGGAGGTGAAGAAGCTGC  |
| PTPN6-R       | GCTGTGGTCAAAGGGGAGAATGTTC  |
| BEX1-F        | TGGAGTCCAAAGAGAAACGAGCAGT  |
| BEX1-R        | TCTAGGCACACAGTATTCACCAGCA  |
| MMP13-F       | AACGCCAGACAAATGTGACCCTTC   |
| MMP13-R       | CGTTAAAAACAGCTCCGCATCAACC  |
| Collagen II-F | ACCTTGGACGCCATGAAGGTTTTTC  |
| Collagen II-R | CTTGCTGCTCCACCAGTTCTTCTTG  |
| GAPDH-F       | GACATCAAGAAGGTGGTGAAGCAGG  |
| GAPDH-R       | GTGTCGCTGTTGAAGTCAGAGGAGA  |
