# Supplementary material for: Machine learning-based identification and immune characterization of ferroptosis-related molecular clusters in osteoarthritis and validation
Source: publisher site journal article supplement (doi:10.18632/aging.205875), 2024-05-29
Supplement: Supplementary file [file aging-v16i11-205875-supplementary-material-SD3.pdf]

## Supplementary File

### Supplementary File 1. (LASSO coefficients).

---

|                  |           |
|------------------|-----------|
| <b>GABARAPL1</b> | -6.55E-01 |
| <b>SAT1</b>      | -4.24E-01 |
| <b>EGFR</b>      | -4.00E-01 |
| <b>ELOVL5</b>    | -3.27E-01 |
| <b>TBK1</b>      | -6.40E-01 |
| <b>SLC39A7</b>   | -7.50E-01 |
| <b>TRIM26</b>    | 6.44E-01  |
| <b>PTPN6</b>     | 3.26E-01  |
| <b>BEX1</b>      | -6.41E-01 |

---
