# Supplementary material for: Machine learning-based identification and immune characterization of ferroptosis-related molecular clusters in osteoarthritis and validation
Source: publisher site journal article supplement (doi:10.18632/aging.205875), 2024-05-29
Supplement: Supplementary file [file aging-v16i11-205875-supplementary-material-SD7.pdf]

**Supplementary File 5. Unsupervised clustering subtype distribution.**

| <b>Sample</b>    | <b>Group</b> |
|------------------|--------------|
| GSM6265697_Treat | C1           |
| GSM6265698_Treat | C1           |
| GSM6265699_Treat | C3           |
| GSM6265700_Treat | C1           |
| GSM6265701_Treat | C2           |
| GSM6265702_Treat | C1           |
| GSM6265703_Treat | C2           |
| GSM6265704_Treat | C3           |
| GSM6265705_Treat | C1           |
| GSM1337314_Treat | C3           |
| GSM1337315_Treat | C3           |
| GSM1337316_Treat | C1           |
| GSM1337317_Treat | C1           |
| GSM1337318_Treat | C2           |
| GSM1337319_Treat | C2           |
| GSM1337320_Treat | C1           |
| GSM1337321_Treat | C1           |
| GSM1337322_Treat | C1           |
| GSM1337323_Treat | C1           |
| GSM1337324_Treat | C1           |
| GSM1337325_Treat | C1           |
| GSM1337326_Treat | C1           |
| GSM1337327_Treat | C3           |
| GSM1337328_Treat | C3           |
| GSM1337329_Treat | C2           |
| GSM1337330_Treat | C3           |
| GSM1337331_Treat | C3           |
| GSM1337332_Treat | C3           |
| GSM1337333_Treat | C3           |
| GSM1337334_Treat | C3           |
| GSM1337335_Treat | C3           |
| GSM1337336_Treat | C2           |
| GSM1332211_Treat | C2           |
| GSM1332212_Treat | C3           |
| GSM1332213_Treat | C2           |
| GSM1332214_Treat | C2           |
| GSM1332215_Treat | C2           |
| GSM1332216_Treat | C3           |
| GSM1332217_Treat | C1           |
| GSM1332218_Treat | C1           |
| GSM1332219_Treat | C3           |
| GSM1332220_Treat | C2           |
| GSM1332221_Treat | C1           |
| GSM1332222_Treat | C1           |
| GSM1332223_Treat | C1           |
| GSM1332224_Treat | C1           |

|                  |    |
|------------------|----|
| GSM1332225_Treat | C1 |
| GSM1332226_Treat | C1 |
| GSM1332227_Treat | C1 |
| GSM1332228_Treat | C1 |
| GSM1332229_Treat | C1 |
| GSM1332230_Treat | C1 |
| GSM2048272_Treat | C2 |
| GSM2048273_Treat | C1 |
| GSM2048274_Treat | C1 |
| GSM2048275_Treat | C3 |
| GSM2048276_Treat | C1 |
| GSM2048277_Treat | C3 |
| GSM2048278_Treat | C3 |
| GSM2048279_Treat | C1 |
| GSM2048280_Treat | C2 |
| GSM2048281_Treat | C2 |
| GSM2048282_Treat | C3 |
| GSM2048283_Treat | C2 |
| GSM2048284_Treat | C3 |
| GSM2048285_Treat | C2 |
| GSM2048286_Treat | C2 |
| GSM2048287_Treat | C2 |

---
